# Supplementary material for: Potential acetylcholine-based communication in honeybee haemocytes and its modulation by a neonicotinoid insecticide
Source: PeerJ. 2024 Sep 13;12:e17978. doi: 10.7717/peerj.17978 (PMC11404474; doi:10.7717/peerj.17978)
Supplement: Supplemental Information 2 [file peerj-12-17978-s002.xlsx]

## Sheet: Tissue_expression
Individual	tissue	target	relative_expression
1	fatbody	a1	0.0392472
1	fatbody	a2	0.0719883
1	fatbody	a3	0.057021
1	fatbody	a4	0.0429171
1	fatbody	a5	0.0500109
1	fatbody	a6	0
1	fatbody	a7	0.0481593
1	fatbody	a8	0.0470452
1	fatbody	a9	0.179824
1	fatbody	b1	0.0391278
1	fatbody	b2	0.117563
1	fatbody	ChAT	0.00261381
2	haemocyte	a1	0
2	haemocyte	a2	0.77465
2	haemocyte	a3	0.131448
2	haemocyte	a4	0
2	haemocyte	a5	0
2	haemocyte	a6	0
2	haemocyte	a7	0.696446
2	haemocyte	a8	0.0943975
2	haemocyte	a9	0
2	haemocyte	b1	0.167417
2	haemocyte	AChT	0.143913
3	midgut	a1	0
3	midgut	a2	0.0636649
3	midgut	a3	0.0460265
3	midgut	a4	0.0518433
3	midgut	a5	0.0357676
3	midgut	a6	0
3	midgut	a7	0.0478003
3	midgut	a8	0.0442814
3	midgut	a9	0.0402263
3	midgut	b1	0.0366838
3	midgut	b2	0.0333787
3	midgut	AChT	0.000782041
4	fatbody	a1	0.0427246
4	fatbody	a2	0.0871946
4	fatbody	a3	0.0687722
4	fatbody	a4	0.0397045
4	fatbody	a5	0.0624747
4	fatbody	a6	0
4	fatbody	a7	0.0507829
4	fatbody	a8	0.0546425
4	fatbody	a9	1.19714
4	fatbody	b1	0.0408661
4	fatbody	b2	0.472523
5	fatbody	ChAT	0.00274614
5	haemocyte	a1	0
5	haemocyte	a2	0.286699
5	haemocyte	a3	0
5	haemocyte	a4	0
5	haemocyte	a5	0
5	haemocyte	a6	0.0973793
5	haemocyte	a7	0.105835
5	haemocyte	a8	0.0670209
5	haemocyte	a9	0.0758148
5	haemocyte	b1	0.0591655
5	haemocyte	b2	0.0715951
5	haemocyte	ChAT	0.139877
6	midgut	a1	0.0407394
6	midgut	a2	0.06181
6	midgut	a3	0.0584013
6	midgut	a4	0.0481175
6	midgut	a5	0.0387788
6	midgut	a6	0
6	midgut	a7	0.0388891
6	midgut	a8	0.0500544
6	midgut	a9	0.0479227
6	midgut	b1	0.0335486
6	midgut	b2	0.0384107
6	midgut	ChAT	0.000364675
7	fatbody	a1	0.0424416
7	fatbody	a2	0.0735963
7	fatbody	a3	0.0617147
7	fatbody	a4	0.0422904
7	fatbody	a5	0.0546253
7	fatbody	a6	0
7	fatbody	a7	0.0471187
7	fatbody	a8	0.0505344
7	fatbody	a9	0.566112
7	fatbody	b1	0.0417937
7	fatbody	b2	0.248111
7	fatbody	ChAT	0.00603627
8	haemocyte	a1	0
8	haemocyte	a2	0.394158
8	haemocyte	a3	0
8	haemocyte	a4	0.0810518
8	haemocyte	a5	0
8	haemocyte	a6	0
8	haemocyte	a7	0.290026
8	haemocyte	a8	0.376042
8	haemocyte	a9	0.115898
8	haemocyte	b1	0.138291
8	haemocyte	b2	0.0928417
8	haemocyte	ChAT	0.0116161
9	midgut	a1	0
9	midgut	a2	0.0608934
9	midgut	a3	0.0572649
9	midgut	a4	0.0488802
9	midgut	a5	0.0389101
9	midgut	a6	0
9	midgut	a7	0.0414606
9	midgut	a8	0.0497672
9	midgut	a9	0.0456774
9	midgut	b1	0.0321903
9	midgut	b2	0.0369089
9	midgut	ChAT	0.000415233
10	fatbody	a1	0.036096
10	fatbody	a2	0.0711311
10	fatbody	a3	0.0525175
10	fatbody	a4	0.0400586
10	fatbody	a5	0.0483949
10	fatbody	a6	0.0240834
10	fatbody	a7	0.0454917
10	fatbody	a8	0.0524939
10	fatbody	a9	0.37081
10	fatbody	b1	0.0336572
10	fatbody	b2	0.166115
10	fatbody	ChAT	0.00164365
11	haemocyte	a1	0
11	haemocyte	a2	0
11	haemocyte	a3	0
11	haemocyte	a4	0
11	haemocyte	a5	0
11	haemocyte	a6	0
11	haemocyte	a7	0
11	haemocyte	a8	0.054432
11	haemocyte	a9	0.2924
11	haemocyte	b1	0.151697
11	haemocyte	b2	0
11	haemocyte	ChAT	0.0844669
12	midgut	a1	0
12	midgut	a2	0.0592822
12	midgut	a3	0.0490604
12	midgut	a4	0.0502234
12	midgut	a5	0.0336661
12	midgut	a6	0.0239569
12	midgut	a7	0.0411926
12	midgut	a8	0.0490521
12	midgut	a9	0.0450389
12	midgut	b1	0.0351973
12	midgut	b2	0.0370817
12	midgut	ChAT	0.00375549
13	fatbody	a1	0.0425036
13	fatbody	a2	0.0797215
13	fatbody	a3	0.0402441
13	fatbody	a4	0.0409921
13	fatbody	a5	0.0495504
13	fatbody	a6	0
13	fatbody	a7	0.0375788
13	fatbody	a8	0.0345146
13	fatbody	a9	0.111936
13	fatbody	b1	0.0374444
13	fatbody	b2	0.0803908
13	fatbody	ChAT	0.00265316
14	haemocyte	a1	0
14	haemocyte	a2	0
14	haemocyte	a3	0.0896347
14	haemocyte	a4	0
14	haemocyte	a5	#VALUE!
14	haemocyte	a6	0
14	haemocyte	a7	0.0908145
14	haemocyte	a8	0.101532
14	haemocyte	a9	0
14	haemocyte	b1	0.0586837
14	haemocyte	b2	0.0758816
14	haemocyte	ChAT	0.102926
15	midgut	a1	0.0373906
15	midgut	a2	0.0639241
15	midgut	a3	0.0553619
15	midgut	a4	0.0467179
15	midgut	a5	0.0389078
15	midgut	a6	0
15	midgut	a7	0.0478629
15	midgut	a8	0.0470047
15	midgut	a9	0.0471665
15	midgut	b1	0.0363718
15	midgut	b2	0
15	midgut	ChAT	0.000511847
16	fatbody	a1	0.0577254
16	fatbody	a2	0.137056
16	fatbody	a3	0.0546351
16	fatbody	a4	0
16	fatbody	a5	0.0712924
16	fatbody	a6	0
16	fatbody	a7	0.0506146
16	fatbody	a8	0.0502139
16	fatbody	a9	0.954132
16	fatbody	b1	0.0405169
16	fatbody	b2	0.183052
16	fatbody	ChAT	0.000605794
17	haemocyte	a1	0.0730621
17	haemocyte	a2	0.11004
17	haemocyte	a3	0
17	haemocyte	a4	0
17	haemocyte	a5	0
17	haemocyte	a6	0
17	haemocyte	a7	0.0813209
17	haemocyte	a8	0.0587871
17	haemocyte	a9	0.156808
17	haemocyte	b1	0.0535758
17	haemocyte	b2	0.0821117
17	haemocyte	ChAT	0.0160592
18	midgut	a1	0.0393174
18	midgut	a2	0.0777033
18	midgut	a3	0.047576
18	midgut	a4	0.0786106
18	midgut	a5	0.0406782
18	midgut	a6	0.0257382
18	midgut	a7	0.0678779
18	midgut	a8	0.0577369
18	midgut	a9	0.0429705
18	midgut	b1	0.06193
18	midgut	b2	0.0349925
18	midgut	ChAT	0.000540422
19	fatbody	a1	0.062529
19	fatbody	a2	0.124501
19	fatbody	a3	0.0533339
19	fatbody	a4	0.0490542
19	fatbody	a5	0.0512201
19	fatbody	a6	0
19	fatbody	a7	0.0576476
19	fatbody	a8	0.0491418
19	fatbody	a9	1.32249
19	fatbody	b1	0.0431811
19	fatbody	b2	0.25231
19	fatbody	ChAT	0.00183442
20	haemocyte	a1	0.095907
20	haemocyte	a2	0.0945781
20	haemocyte	a3	0
20	haemocyte	a4	0
20	haemocyte	a5	0.0620167
20	haemocyte	a6	0
20	haemocyte	a7	0.0624625
20	haemocyte	a8	0.0494817
20	haemocyte	a9	0.0616599
20	haemocyte	b1	0.0528724
20	haemocyte	b2	0.0533077
20	haemocyte	ChAT	0.00785389
21	midgut	a1	0.0420371
21	midgut	a2	0.0676215
21	midgut	a3	0.044601
21	midgut	a4	0.0645962
21	midgut	a5	0.0376629
21	midgut	a6	0
21	midgut	a7	0.0580919
21	midgut	a8	0.0525718
21	midgut	a9	0.0392958
21	midgut	b1	0.0489221
21	midgut	b2	0.030554
21	midgut	ChAT	0.000339678
22	haemocyte	a1	0
22	haemocyte	a2	0.30781
22	haemocyte	a3	0
22	haemocyte	a4	0
22	haemocyte	a5	0.0800692
22	haemocyte	a6	0.0376727
22	haemocyte	a7	0.30287
22	haemocyte	a8	0.10842
22	haemocyte	a9	0
22	haemocyte	b1	0.121529
22	haemocyte	b2	0
22	haemocyte	ChAT	0.0149306
23	brain	a1	0.0730645
23	brain	a2	0.746419
23	brain	a3	0.293332
23	brain	a4	0.190495
23	brain	a5	0.476614
23	brain	a6	0.100988
23	brain	a7	146.931
23	brain	a8	0.169573
23	brain	a9	0.00638625
23	brain	b1	0.18491
23	brain	b2	0.0113292
24	brain	ChAT	0.875074
24	brain	a1	0.0211934
24	brain	a2	0.245921
24	brain	a3	0.0832784
24	brain	a4	0.0691186
24	brain	a5	0.209429
24	brain	a6	0.011821
24	brain	a7	151.493
24	brain	a8	0.147352
24	brain	a9	0.00848904
24	brain	b1	0.0799567
24	brain	b2	0.0078697
25	brain	ChAT	0.852515
25	brain	a1	0.0172536
25	brain	a2	0.200892
25	brain	a3	0.0385498
25	brain	a4	0.0370793
25	brain	a5	0.126378
25	brain	a6	0.0073595
25	brain	a7	105.347
25	brain	a8	0.0394386
25	brain	a9	0.0105942
25	brain	b1	1.15364
25	brain	b2	0.00160081
26	brain	ChAT	0.64978
26	brain	a1	0.0256243
26	brain	a2	0.270781
26	brain	a3	0.087529
26	brain	a4	0.0807731
26	brain	a5	0.127176
26	brain	a6	0.00480046
26	brain	a7	110.213
26	brain	a8	0.0844879
26	brain	a9	0.0705924
26	brain	b1	0.0701062
26	brain	b2	0.0110156
27	brain	ChAT	1.08751
27	brain	a1	0.0229004
27	brain	a2	0.803874
27	brain	a3	0.199828
27	brain	a4	0.201552
27	brain	a5	0.336208
27	brain	a6	0.00878255
27	brain	a7	164.959
27	brain	a8	0.168912
27	brain	a9	0
27	brain	b1	0.206249
27	brain	b2	0.017917
28	brain	ChAT	1.20837

## Sheet: Experiment_1
pool_sample_id	treatment	tissue	rel_ChAT
1	control	haemocyte	0.00507797
2	control	haemocyte	0.0115318
3	control	haemocyte	0.0138675
4	control	haemocyte	0.00171248
5	control	haemocyte	0.000612496
6	control	haemocyte	0.0352037
7	control	haemocyte	0.00334882
8	clothianidin 5ppm	haemocyte	0.0156047
9	clothianidin 5ppm	haemocyte	0.0369032
10	clothianidin 5ppm	haemocyte	0.0367227
11	clothianidin 5ppm	haemocyte	0.0141764
12	clothianidin 5ppm	haemocyte	0.0176262
13	clothianidin 5ppm	haemocyte	0.0228973

## Sheet: Experiment_1_survival_consum
id	Treatment	sugar_start	sugar_end	consumed[g]	consumed[L]	dead
1	control	NA	NA	NA	NA	1
2	control	3.599	3.531	0.068	5.6168e-05	0
3	control	NA	NA	NA	NA	1
4	control	3.528	3.392	0.136	0.112336	0
5	control	NA	NA	NA	NA	1
6	control	NA	NA	NA	NA	1
7	control	3.496	3.429	0.067	0.055342	0
8	control	NA	NA	NA	NA	1
9	control	3.555	3.485	0.07	0.05782	0
10	control	NA	NA	NA	NA	1
11	control	3.537	3.474	0.063	0.052038	0
12	control	3.551	3.493	0.058	0.047908	0
13	control	NA	NA	NA	NA	1
14	control	3.488	3.409	0.079	0.065254	0
15	control	NA	NA	NA	NA	1
16	control	3.34	3.228	0.112	0.092512	0
17	control	3.606	3.497	0.109	0.090034	0
18	control	3.551	3.503	0.048	0.039648	0
19	control	NA	NA	NA	NA	1
20	control	3.439	3.389	0.05	0.0413	0
21	control	NA	NA	NA	NA	1
22	control	NA	NA	NA	NA	1
23	control	3.485	3.43	0.055	0.04543	0
24	control	NA	NA	NA	NA	1
25	control	NA	NA	NA	NA	1
26	control	3.344	3.256	0.088	0.072688	0
27	control	3.475	3.432	0.043	0.035518	0
28	control	3.505	3.39	0.115	0.09499	0
29	control	NA	NA	NA	NA	1
30	control	3.65	3.581	0.069	0.056994	0
31	control	NA	NA	NA	NA	1
32	control	NA	NA	NA	NA	1
33	clothianidin 5ppm	NA	NA	NA	NA	1
34	clothianidin 5ppm	NA	NA	NA	NA	1
35	clothianidin 5ppm	NA	NA	NA	NA	1
36	clothianidin 5ppm	NA	NA	NA	NA	1
37	clothianidin 5ppm	NA	NA	NA	NA	1
38	clothianidin 5ppm	3.54	3.499	0.041	0.033866	0
39	clothianidin 5ppm	NA	NA	NA	NA	1
40	clothianidin 5ppm	NA	NA	NA	NA	1
41	clothianidin 5ppm	NA	NA	NA	NA	1
42	clothianidin 5ppm	3.544	3.452	0.092	0.075992	0
43	clothianidin 5ppm	3.557	3.456	0.101	0.083426	0
44	clothianidin 5ppm	3.554	3.424	0.13	0.10738	0
45	clothianidin 5ppm	3.556	3.504	0.052	0.042952	0
46	clothianidin 5ppm	3.58	3.51	0.07	0.05782	0
47	clothianidin 5ppm	NA	NA	NA	NA	1
48	clothianidin 5ppm	3.551	3.458	0.093	0.076818	0
49	clothianidin 5ppm	3.527	3.458	0.069	0.056994	0
50	clothianidin 5ppm	3.582	3.5	0.082	0.067732	0
51	clothianidin 5ppm	3.532	3.492	0.04	0.03304	0
52	clothianidin 5ppm	3.533	3.459	0.074	0.061124	0
53	clothianidin 5ppm	NA	NA	NA	NA	1
54	clothianidin 5ppm	3.518	3.446	0.072	0.059472	0
55	clothianidin 5ppm	3.532	3.488	0.044	0.036344	0
56	clothianidin 5ppm	3.578	3.517	0.061	0.050386	0
57	clothianidin 5ppm	NA	NA	NA	NA	1
58	clothianidin 5ppm	NA	NA	NA	NA	1
59	clothianidin 5ppm	NA	NA	NA	NA	1
60	clothianidin 5ppm	NA	NA	NA	NA	1
61	clothianidin 5ppm	NA	NA	NA	NA	1
62	clothianidin 5ppm	NA	NA	NA	NA	1

## Sheet: Legend
Legende
target	a1-a9	alpha subunit 1-9
	b1-b2	beta subunit 1-2
id	bee individual number
tissue	tissue type
relative expression	n fold expression relative to reference gene
Experiemnt 1
rel_ChAT	n fold expression of Choline Acetyltranferase relative to reference gene
haemolymph[microL]	haemolymph extraced in µL
RNA[ng]	total RNA extracted form haemolyph measured on nanodrop2000
RNA/microL	RNA[ng]/haemolymph [µL]
sugar_start	syringe weight start
sugar_end	syringe weight end
consumed[g]	solution consumed in g
consumed[L]	solution consumed in L
neonic_consumed[ng]	amount of cloth consumed in ng
dead	0 = alive
	1 = dead
